# Supplementary material for: GTDB: an ongoing census of bacterial and archaeal diversity through a phylogenetically consistent, rank normalized and complete genome-based taxonomy
Source: PubMed Central journal article supplement (PMC8728215; doi:10.1093/nar/gkab776), 2021-09-14
Supplement: gkab776_supplemental_file.pdf [file gkab776_supplemental_file.pdf]

# GTDB: an ongoing census of bacterial and archaeal diversity through a phylogenetically consistent, rank normalized, and complete genome-based taxonomy

Donovan H Parks, Maria Chuvochina, Christian Rinke, Aaron J Mussig, Pierre-Alain Chaumeil, Philip Hugenholtz

**Supplementary Table 1.** Growth in number of genomes and taxa in the GTDB.

|                          | <i>R01-RS80</i> | <i>R02-RS83</i> | <i>R03-RS86.2</i> | <i>R04-RS89</i> | <i>R05-RS95</i> | <i>R06-RS202</i> |
|--------------------------|-----------------|-----------------|-------------------|-----------------|-----------------|------------------|
| <b>Release data</b>      | 1-Nov-17        | 8-Mar-18        | 19-Aug-18         | 17-Jun-19       | 17-Jul-20       | 27-Apr-21        |
| <b>Bacterial genomes</b> | 94759           | 109419          | 125243            | 143512          | 191527          | 254090           |
| Isolates                 | 80730           | 95056           | 108974            | 122939          | 164719          | 202676           |
| MAGs                     | 13839           | 14166           | 16070             | 19880           | 26107           | 50669            |
| SAGs                     | 190             | 197             | 199               | 693             | 701             | 745              |
| <b>Archaeal genomes</b>  | n/a             | n/a             | 2075              | 2392            | 3073            | 4316             |
| Isolates                 | n/a             | n/a             | 779               | 777             | 946             | 1195             |
| MAGs                     | n/a             | n/a             | 1269              | 1574            | 2079            | 3068             |
| SAGs                     | n/a             | n/a             | 27                | 41              | 48              | 53               |
| <b>Bacterial taxa</b>    |                 |                 |                   |                 |                 |                  |
| Phyla                    | 98              | 99              | 104               | 112             | 111             | 127              |
| Classes                  | 262             | 269             | 284               | 296             | 327             | 360              |
| Orders                   | 702             | 728             | 773               | 816             | 917             | 1163             |
| Families                 | 1558            | 1624            | 1809              | 1969            | 2282            | 2886             |
| Genera                   | 5426            | 5697            | 6482              | 7372            | 8778            | 12037            |
| Species                  | 8885            | 9912            | 11043             | 23458           | 30238           | 45555            |
| <b>Archaeal taxa</b>     |                 |                 |                   |                 |                 |                  |
| Phyla                    | n/a             | n/a             | 11                | 16              | 18              | 19               |
| Classes                  | n/a             | n/a             | 39                | 36              | 42              | 47               |
| Orders                   | n/a             | n/a             | 96                | 96              | 103             | 116              |
| Families                 | n/a             | n/a             | 188               | 238             | 276             | 336              |
| Genera                   | n/a             | n/a             | 440               | 534             | 650             | 851              |
| Species                  | n/a             | n/a             | 510               | 1248            | 1672            | 2339             |

**Supplementary Table 2.** Species with the largest number of genomes in the GTDB since the inception of ANI-based species clusters in R04-RS89.

|                                   | <i>R04-RS89</i> | <i>R05-RS95</i> | <i>R06-RS202</i> |
|-----------------------------------|-----------------|-----------------|------------------|
| <i>Escherichia flexneri</i>       | 9,084           | 12,267          | 14,743           |
| <i>Staphylococcus aureus</i>      | 9,444           | 10,497          | 12,022           |
| <i>Salmonella enterica</i>        | 8,698           | 10,510          | 11,523           |
| <i>Klebsiella pneumoniae</i>      | 4,086           | 7,580           | 9,621            |
| <i>Streptococcus pneumoniae</i>   | 8,201           | 8,340           | 8,405            |
| <i>Mycobacterium tuberculosis</i> | 5,596           | 6,514           | 6,684            |
| <i>Pseudomonas aeruginosa</i>     | 2,744           | 4,561           | 5,211            |
| <i>Acinetobacter baumannii</i>    | 2,796           | 3,975           | 4,766            |
| <i>Escherichia coli</i>           | 2,432           | 3,724           | 4,370            |
| <i>Streptococcus pyogenes</i>     | 427             | 1,915           | 2,136            |
| <i>Clostridioides difficile</i>   | 1,079           | 2,007           | 2,079            |
| <i>Mycobacterium abscessus</i>    | 1,589           | 1,673           | 1,686            |
| <b>Total</b>                      | 56,176          | 73,563          | 83,246           |
| <b>Growth</b>                     | -               | 31.0%           | 13.1%            |
